# Supplementary material
Source: publisher figshare collection journal article supplement (https://tandf.figshare.com/ndownloader/files/15316637)
Supplement: Supplementary file 1 [file 15316637]

Supplementary Table 1. Primers used in this study

| Gene Name | Gene No. |  | Sequences (5´ to 3´) |
| --- | --- | --- | --- |
| *CCoAOMT1* | At4g34050 | Forward | CTGGCTATGGATGTCAACAGAG |
|  |  | Reverse | ATCAAGAACGGGAAGAGCAG |
| *4CL1* | At1g51680 | Forward | TGCCTAATCAACGGACCAAC |
|  |  | Reverse | AATTCGGGACAGTTTGGGAG |
| *4CL2* | At3g21240 | Forward | CTATGGGATGACAGAAGCAGG |
|  |  | Reverse | GTATCTTCATCTCGGCGTTCC |
| *C4H* | At2g30490 | Forward | CCGGGAAAGGTCAAGATATGG |
|  |  | Reverse | TCAAACTCCCAACCTTCACG |
| *CAD5* | At4g34230 | Forward | AATCTGCCACACCGATCTTC |
|  |  | Reverse | AACCAACTCCAACTATGTCCC |
| *CAD6* | At4g37970 | Forward | CAAATGAAGGCTGCAATGGG |
|  |  | Reverse | ACCGAGTAGAACAAGTTTACCG |
| *CCR1* | At1g15950 | Forward | AGGAGAAAGGTGTTGACTTGG |
|  |  | Reverse | TGGTAAAGACTGGCGTTGATC |
| *CCR-like1* | At2g02400 | Forward | TTAGATGAGGCATGTTGGTCTG |
|  |  | Reverse | CAAAACAAGGGTAGGGCAAAC |
| *CCR-like2* | At2g33600 | Forward | TTTGCTCAACTACGGCTCTC |
|  |  | Reverse | ACATTCAGCGTACCATCCAC |
| *AtPRX52* | At5g05340 | Forward | CTTCTACTCAACCTCTTGCCC |
|  |  | Reverse | CCGTTGACAAAGCAATCGTG |
| *COMT1* | At5g54160 | Forward | CAAGCCTCTCAACCAAACAAG |
|  |  | Reverse | TGCCTCAAACTCTTTCTCGG |
| *F5H1* | At4g36220 | Forward | CTCGACAAGTCCTTCAAGTCC |
|  |  | Reverse | TCTCATCTGTCTCCAAAACGG |
| *PAL1* | At2g37040 | Forward | CAGGATCAAGGAATGTAGGTCG |
|  |  | Reverse | AAATCGCCGTGAAAACCTTG |
| *PAL2* | At3g53260 | Forward | CGTAGACCAGTCGTGAATCTTG |
|  |  | Reverse | TCTCCATAACCCAATCACTGC |
| *PAL3* | At5g04230 | Forward | AGCGGTTAATGAGGTTGTGAG |
|  |  | Reverse | TTAAAGGGTTAGTGAGGCTGC |
| *TUBULIN2* | At5g62690 | Forward | TGGCATCAACTTTCATTGGA |
|  |  | Reverse | ATGTTGCTCTCCGCTTCTGT |
